# Supplementary material for: Development of a patient decision aid on subacromial decompression surgery and rotator cuff repair surgery: an international mixed-methods study
Source: PubMed Central journal article supplement — BMJ Open. 2021 Aug 25;11(8):e054032. doi: 10.1136/bmjopen-2021-054032 (PMC8407224; doi:10.1136/bmjopen-2021-054032), 2021-08-25
Supplement: bmjopen-2021-054032supp002.pdf [file bmjopen-2021-054032supp002.pdf]

Supplementary File 2. Consolidated Criteria for Reporting Qualitative Research (COREQ) checklist

| Items                                    | Guide questions/description                                                                                                                               | Yes/No |
|------------------------------------------|-----------------------------------------------------------------------------------------------------------------------------------------------------------|--------|
| Interviewer/facilitator                  | Which author/s conducted the interview or focus group?                                                                                                    | Yes    |
| Credentials                              | What were the researcher's credentials? e.g., PhD, MD                                                                                                     | Yes    |
| Occupation                               | What was their occupation at the time of the study?                                                                                                       | Yes    |
| Gender                                   | Was the researcher male or female?                                                                                                                        | Yes    |
| Experience and training                  | What experience or training did the researcher have?                                                                                                      | Yes    |
| Relationship established                 | Was a relationship established prior to study commencement?                                                                                               | Yes    |
| Participant knowledge of the interviewer | What did the participants know about the researcher? e.g., personal goals, reasons for doing the research                                                 | Yes    |
| Interviewer characteristics              | What characteristics were reported about the interviewer/facilitator? e.g., Bias, assumptions, reasons and interests in the research topic                | Yes    |
| Methodological orientation and theory    | What methodological orientation was stated to underpin the study? e.g., grounded theory, discourse analysis, ethnography, phenomenology, content analysis | Yes    |
| Sampling                                 | How were participants selected? e.g., purposive, convenience, consecutive, snowball                                                                       | Yes    |
| Method of approach                       | How were participants approached? e.g., face-to-face, telephone, mail, email                                                                              | Yes    |
| Sample size                              | How many participants were in the study?                                                                                                                  | Yes    |
| Non-participation                        | How many people refused to participate or dropped out? Reasons?                                                                                           | Yes    |
| Setting of data collection               | Where was the data collected? e.g., home, clinic, workplace                                                                                               | Yes    |
| Presence of non-participants             | Was anyone else present besides the participants and researchers?                                                                                         | Yes    |
| Description of sample                    | What are the important characteristics of the sample? e.g., demographic data, date                                                                        | Yes    |
| Interview guide                          | Were questions, prompts, guides provided by the authors? Was it pilot tested?                                                                             | Yes    |
| Repeat interviews                        | Were repeat interviews carried out? If yes, how many?                                                                                                     | Yes    |
| Audio/visual recording                   | Did the research use audio or visual recording to collect the data?                                                                                       | Yes    |
| Field notes                              | Were field notes made during and/or after the interview or focus group?                                                                                   | Yes    |
| Duration                                 | What was the duration of the interviews or focus group?                                                                                                   | Yes    |
| Data saturation                          | Was data saturation discussed?                                                                                                                            | Yes    |

|                                |                                                                                                                                   |     |
|--------------------------------|-----------------------------------------------------------------------------------------------------------------------------------|-----|
| Transcripts returned           | Were transcripts returned to participants for comment and/or correction?                                                          | Yes |
| Number of data coders          | How many data coders coded the data?                                                                                              | Yes |
| Description of the coding tree | Did authors provide a description of the coding tree?                                                                             | Yes |
| Derivation of themes           | Were themes identified in advance or derived from the data?                                                                       | Yes |
| Software                       | What software, if applicable, was used to manage the data?                                                                        | Yes |
| Participants checking          | Did participants provide feedback on the findings?                                                                                | Yes |
| Quotations presented           | Were participant quotations presented to illustrate the themes / findings? Was each quotation identified? e.g. participant number | Yes |
| Data and findings consistent   | Was there consistency between the data presented and the findings?                                                                | Yes |
| Clarity of major themes        | Were major themes clearly presented in the findings?                                                                              | Yes |
| Clarity of minor themes        | Is there a description of diverse cases or discussion of minor themes?                                                            | Yes |
