# Supplementary material for: Development of a patient decision aid on subacromial decompression surgery and rotator cuff repair surgery: an international mixed-methods study
Source: PubMed Central journal article supplement — BMJ Open. 2021 Aug 25;11(8):e054032. doi: 10.1136/bmjopen-2021-054032 (PMC8407224; doi:10.1136/bmjopen-2021-054032), 2021-08-25
Supplement: bmjopen-2021-054032supp003.pdf [file bmjopen-2021-054032supp003.pdf]

### Supplementary File 3. Health professional questionnaire

Thank you for your participation in this study, which is investigating what information health professionals feel patients need to know when considering shoulder surgery.

We would like you to answer a few questions before the interview. This should not take more than 5-10 minutes.

#### First some quick questions about you...

1. Please indicate your gender:

Female

Male

Prefer not to say

2. Please indicate your age: [free text response]

\_\_\_\_\_

3. In which country do you currently practice? [free text response]

\_\_\_\_\_

4. What health profession are you?

Orthopaedic surgeon

General practitioner

Rheumatologist

Sports medicine doctor

Physiotherapist

Other (please specify) \_\_\_\_\_

5. How many years have you been practicing? [free text response]

\_\_\_\_\_

6. Which clinical setting have you spent the most time practicing in?

Private practice

Public hospital

Private hospital

Sports teams

Other (please specify) \_\_\_\_\_

7. On average, how many patients with subacromial pain syndrome do you manage/review per year? [free text response]

\_\_\_\_\_

**Thank you for completing the questionnaire.**
