# Supplementary material for: Development of a patient decision aid on subacromial decompression surgery and rotator cuff repair surgery: an international mixed-methods study
Source: PubMed Central journal article supplement — BMJ Open. 2021 Aug 25;11(8):e054032. doi: 10.1136/bmjopen-2021-054032 (PMC8407224; doi:10.1136/bmjopen-2021-054032), 2021-08-25
Supplement: bmjopen-2021-054032supp004.pdf [file bmjopen-2021-054032supp004.pdf]

### Supplementary File 4. Patient questionnaire

Thank you for your participation in this study, which is investigating what information patients feel is important to know when considering shoulder surgery.

We would like you to answer a few questions before the interview. This should not take more than 5-10 minutes.

#### First some quick questions about you...

1. Please indicate your gender:
  - Female
  - Male
  - Prefer not to say
2. Please indicate your age: [free text response]  
\_\_\_\_\_
3. In which country were you born? [free text response]  
\_\_\_\_\_
4. What option best describes your highest level of education?
  - Primary school or less
  - High school (not completed)
  - High school (completed)
  - TAFE/Trade
  - University- undergraduate degree/s (completed)
  - University- postgraduate degree/s e.g. Masters, PhD (completed)
  - Other (please specify) \_\_\_\_\_
5. What is your employment status?
  - Employed part-time
  - Employed full-time
  - Casual work
  - Retired
  - Unemployed
  - Student
  - Sick/disability leave
  - Other (please specify) \_\_\_\_\_
6. Do you have private health insurance?
  - Yes
  - No
7. How long have you had your shoulder pain (in weeks, months or years)?  
\_\_\_\_\_
8. During the past week, how much did shoulder pain interfere with your normal work (including both work outside the home and housework)?

- Not at all
  - A little bit
  - Moderately
  - Quite a bit
  - Extremely
9. What treatment options have you tried for you shoulder pain?
- Rest
  - Medication
  - Exercise
  - Massage
  - Manual therapy (usually provided by a physiotherapist)
  - Injections
  - Surgery
  - Other (please specify) \_\_\_\_\_
10. Have you previously had a scan on your affected shoulder (e.g Xray, ultrasound, MRI)?
- Yes
  - No
11. Have you previously taken sick leave due to shoulder pain?
- Yes
  - No
12. If you have had shoulder surgery, please specify the procedure (i.e. rotator cuff repair, shaving back a bone spur, removal of bursa) [free text response]
- \_\_\_\_\_

**Thank you for completing the questionnaire.**
