# Supplementary material for: Development of a patient decision aid on subacromial decompression surgery and rotator cuff repair surgery: an international mixed-methods study
Source: PubMed Central journal article supplement — BMJ Open. 2021 Aug 25;11(8):e054032. doi: 10.1136/bmjopen-2021-054032 (PMC8407224; doi:10.1136/bmjopen-2021-054032), 2021-08-25
Supplement: bmjopen-2021-054032supp008.pdf [file bmjopen-2021-054032supp008.pdf]

### Supplementary File 8. Acceptability questionnaire for patients

We would like to know what you think about the patient decision aid you have just read.

1. Please rate each section by circling 'poor', 'fair', 'good', or 'excellent' to show what you think about the way the information was presented on:

|                                                                                                                |      |      |      |           |
|----------------------------------------------------------------------------------------------------------------|------|------|------|-----------|
| Subacromial shoulder pain: should I have surgery?                                                              | Poor | Fair | Good | Excellent |
| Causes and symptoms of subacromial shoulder pain                                                               | Poor | Fair | Good | Excellent |
| What are the treatment options covered in this decision aid? (Non-surgical options)                            | Poor | Fair | Good | Excellent |
| What are the treatment options covered in this decision aid? (Surgery)                                         | Poor | Fair | Good | Excellent |
| What are the likely benefits of surgery and non-surgical options? (Key message)                                | Poor | Fair | Good | Excellent |
| What are the likely benefits of surgery and non-surgical options? (What % of people report treatment success?) | Poor | Fair | Good | Excellent |
| What are the likely risks of surgery?                                                                          | Poor | Fair | Good | Excellent |
| What practical issues should I consider?                                                                       | Poor | Fair | Good | Excellent |
| Questions to consider when talking with your health professional                                               | Poor | Fair | Good | Excellent |

2. The length of the decision aid was (check one):
  - a. Too long
  - b. Too short
  - c. Just right
3. The amount of information was (check one):
  - a. Too much information
  - b. Too little information
  - c. Just right
4. I found the presentation (check one):
  - a. Slanted towards non-surgical options
  - b. Slanted towards surgery
  - c. Balanced
5. Would you find (or would you have found) this decision aid useful when /if you were making your decision about surgery for subacromial shoulder pain?
  - a. Yes
  - b. No
  - c. Comments:
6. Did this decision aid/would this decision aid make your decision to have surgery:
  - a. Easy

- b. More difficult
  - c. Comments:
7. Do you think we provided enough information to help people with subacromial shoulder pain decide on whether to have surgery or not?
- a. Yes
  - b. No
  - c. Comments:
