# Supplementary material for: Development of a patient decision aid on subacromial decompression surgery and rotator cuff repair surgery: an international mixed-methods study
Source: PubMed Central journal article supplement — BMJ Open. 2021 Aug 25;11(8):e054032. doi: 10.1136/bmjopen-2021-054032 (PMC8407224; doi:10.1136/bmjopen-2021-054032), 2021-08-25
Supplement: bmjopen-2021-054032supp010.pdf [file bmjopen-2021-054032supp010.pdf]

Supplementary File 10. International Patient Decision Aid Standards checklist (IPDASi v4.0)

| <b>Qualifying criteria</b>                                                                                                                                                                                 | <b>Answer</b> |
|------------------------------------------------------------------------------------------------------------------------------------------------------------------------------------------------------------|---------------|
| 1. The patient decision aid describes the health condition or problem (treatment, procedure, or investigation) for which the index decision is required.                                                   | Yes           |
| 2. The patient decision aid explicitly states the decision that needs to be considered (index decision).                                                                                                   | Yes           |
| 3. The patient decision aid describes the options available for the index decision.                                                                                                                        | Yes           |
| 4. The patient decision aid describes the positive features (benefits or advantages) of each option.                                                                                                       | Yes           |
| 5. The patient decision aid describes the negative features (harms, side effects, or disadvantages) of each option.                                                                                        | Yes           |
| 6. The patient decision aid describes what it is like to experience the consequences of the options (e.g., physical, psychological, social).                                                               | Yes           |
| <b>Certification criteria</b>                                                                                                                                                                              | <b>Answer</b> |
| 1. The patient decision aid shows the negative and positive features of options with equal detail (e.g., using similar fonts, sequence, presentation of statistical information).                          | Yes           |
| 2. The patient decision aid (or associated documentation) provides citations to the evidence selected.                                                                                                     | Yes           |
| 3. The patient decision aid (or associated documentation) provides a production or publication date.                                                                                                       | Yes           |
| 4. The patient decision aid (or associated documentation) provides information about the update policy.                                                                                                    | Yes           |
| 5. The patient decision aid provides information about the levels of uncertainty around event or outcome probabilities (e.g., by giving a range or by using phrases such as “our best estimate is . . .”). | Yes           |
| 6. The patient decision aid (or associated documentation) provides information about the funding source used for development.                                                                              | Yes           |
| 7. The patient decision aid describes what the test is designed to measure.                                                                                                                                | N/A           |
| 8. If the test detects the condition or problem, the patient decision aid describes the next steps typically taken.                                                                                        | N/A           |
| 9. The patient decision aid describes the next steps if the condition or problem is not detected.                                                                                                          | N/A           |
| 10. The patient decision aid has information about the consequences of detecting the condition or disease that would never have caused problems if screening had not been done (lead time bias).           | N/A           |
| <b>Quality criteria</b>                                                                                                                                                                                    | <b>Answer</b> |
| 1. The patient decision aid describes the natural course of the health condition or problem, if no action is taken (when appropriate).                                                                     | Yes           |
| 2. The patient decision aid makes it possible to compare the positive and negative features of the available options.                                                                                      | Yes           |
| 3. The patient decision aid provides information about outcome probabilities associated with the options (i.e., the likely consequences of decisions).                                                     | Yes           |
| 4. The patient decision aid specifies the defined group (reference class) of patients for whom the outcome probabilities apply.                                                                            | Yes           |

|                                                                                                                                                              |     |
|--------------------------------------------------------------------------------------------------------------------------------------------------------------|-----|
| 5. The patient decision aid specifies the event rates for the outcome probabilities                                                                          | Yes |
| 6. The patient decision aid allows the user to compare outcome probabilities across options using the same time period (when feasible).                      | Yes |
| 7. The patient decision aid allows the user to compare outcome probabilities across options using the same denominator (when feasible).                      | Yes |
| 8. The patient decision aid provides more than 1 way of viewing the probabilities (e.g., words, numbers, and diagrams).                                      | Yes |
| 9. The patient decision aid asks patients to think about which positive and negative features of the options matter most to them (implicitly or explicitly). | Yes |
| 10. The patient decision aid provides a step-by step way to make a decision.                                                                                 | Yes |
| 11. The patient decision aid includes tools like worksheets or lists of questions to use when discussing options with a practitioner.                        | Yes |
| 12. The development process included a needs assessment with clients or patients.                                                                            | Yes |
| 13. The development process included a needs assessment with health professionals.                                                                           | Yes |
| 14. The development process included review by clients/patients not involved in producing the decision support intervention.                                 | Yes |
| 15. The development process included review by professionals not involved in producing the decision support intervention.                                    | Yes |
| 16. The patient decision aid was field tested with patients who were facing the decision.                                                                    | Yes |
| 17. The patient decision aid was field tested with practitioners who counsel patients who face the decision.                                                 | Yes |
| 18. The patient decision aid (or associated documentation) describes how research evidence was selected or synthesized.                                      | Yes |
| 19. The patient decision aid (or associated documentation) describes the quality of the research evidence used.                                              | Yes |
| 20. The patient decision aid includes authors'/developers' credentials or qualifications.                                                                    | Yes |
| 21. The patient decision aid (or associated documentation) reports readability levels (using 1 or more of the available scales).                             | No  |
| 22. There is evidence that the patient decision aid improves the match between the preferences of the informed patient and the option that is chosen.        | No* |
| 23. There is evidence that the patient decision aid helps patients improve their knowledge about options' features.                                          | No* |
| 24. The patient decision aid includes information about the chances of having a true-positive test result.                                                   | N/A |
| 25. The patient decision aid includes information about the chances of having a true-negative test result.                                                   | N/A |
| 26. The patient decision aid includes information about the chances of having a false-positive test result.                                                  | N/A |
| 27. The patient decision aid includes information about the chances of having a false-negative test result.                                                  | N/A |
| 28. The patient decision aid describes the chances the disease is detected with and without the use of the test.                                             | N/A |

N/A: not applicable.

\*we are in the process of evaluating the decision aid in a randomised controlled trial.
