# Supplementary material for: Development of a patient decision aid on subacromial decompression surgery and rotator cuff repair surgery: an international mixed-methods study
Source: PubMed Central journal article supplement — BMJ Open. 2021 Aug 25;11(8):e054032. doi: 10.1136/bmjopen-2021-054032 (PMC8407224; doi:10.1136/bmjopen-2021-054032), 2021-08-25
Supplement: bmjopen-2021-054032supp013.pdf [file bmjopen-2021-054032supp013.pdf]

Supplementary File 13. Reasons for not implementing feedback for each section of the decision aid.

| Themes                                                 | Sub-themes                                                                                                                                                                                        | Reason for not implementing feedback                                                                                                                                              |
|--------------------------------------------------------|---------------------------------------------------------------------------------------------------------------------------------------------------------------------------------------------------|-----------------------------------------------------------------------------------------------------------------------------------------------------------------------------------|
| <b>WHO SHOULD READ THIS DECISION AID?</b>              |                                                                                                                                                                                                   |                                                                                                                                                                                   |
| <b>Improve clarity on the target population</b>        | <b>Health professionals</b><br>Make the information more specific to a diagnosis [OS/PT]                                                                                                          | Identifying a structural nociceptive cause of subacromial impingement syndrome is not possible, so we decided to keep the diagnosis broad (i.e. subacromial impingement syndrome) |
|                                                        | <b>Patients</b><br>Make it clear the decision aid is for people with subacromial impingement syndrome (e.g. include the diagnosis in the title)                                                   | Opposing feedback to remove the term 'subacromial impingement syndrome'                                                                                                           |
| <b>Revise the causes and symptoms of shoulder pain</b> | <b>Health professionals</b><br>Clarify that shoulder pain can be caused by overuse and work (e.g. heavy lifting) [GP/PT]                                                                          | Potential causes of shoulder pain were removed as they were too speculative                                                                                                       |
|                                                        | <b>Patients</b><br>Describe what causes the structural issues associated with shoulder pain (e.g. explain why a tendon tears or a bursa gets inflamed)                                            | This information would have been too speculative due to a lack of evidence on this issue                                                                                          |
| <b>Use positive messaging</b>                          | <b>Health professionals</b><br>Language will cause fear among patients [CP/PT]                                                                                                                    | Opposing positive feedback from patients on our explanation of shoulder pain                                                                                                      |
|                                                        | Include positive messaging about prognosis and what pain means (e.g. pain doesn't equal damage, pain may get better with time, imaging findings are common in people without symptoms) [CP/PT/OP] | Beyond the scope of this decision aid                                                                                                                                             |
| <b>Make this section more concise and relevant</b>     | <b>Health professionals</b><br>Explanation of shoulder symptoms might be irrelevant for patients [GP/OS/PT]                                                                                       | Opposing positive feedback on our explanation of shoulder symptoms                                                                                                                |
|                                                        | Graphic of pain distribution might be more useful than a graphic of the shoulder anatomy [OS/PT]                                                                                                  | Opposing positive feedback on our graphic of shoulder anatomy                                                                                                                     |

**WHAT ARE THE TREATMENT OPTIONS COVERED IN THIS DECISION AID?**

|                                                                                   |                                                                                                                                                                                          |                                                                                                                                                                                                                      |
|-----------------------------------------------------------------------------------|------------------------------------------------------------------------------------------------------------------------------------------------------------------------------------------|----------------------------------------------------------------------------------------------------------------------------------------------------------------------------------------------------------------------|
| <b>Include more detail on non-surgical options and how to progress management</b> | <b>Health professionals</b>                                                                                                                                                              |                                                                                                                                                                                                                      |
|                                                                                   | Need a flowchart of non-surgical options [PT]                                                                                                                                            | Opposing positive feedback on the layout of non-surgical options                                                                                                                                                     |
|                                                                                   | Highlight how long patients should try different non-surgical options before surgery [GP/PT]                                                                                             | There is no evidence to guide timeframes on trying various non-surgical options. This could depend on treatment success and patient preferences                                                                      |
|                                                                                   | More detail is needed on muscle strengthening programs [PT]                                                                                                                              | Beyond the scope of this decision aid                                                                                                                                                                                |
|                                                                                   | Include evidence for non-surgical options [PT/OS]                                                                                                                                        | This decision aid was developed for people considering surgery. We only included one treatment decision (i.e. surgery vs. non-surgical options) and hence, the evidence for surgery compared to non-surgical options |
|                                                                                   | <b>Patients</b>                                                                                                                                                                          |                                                                                                                                                                                                                      |
|                                                                                   | Provide more non-surgical options                                                                                                                                                        | Opposing positive feedback that our decision aid covers all potentially valuable options                                                                                                                             |
|                                                                                   | Provide evidence for various non-surgical options (e.g. options listed in the decision aid, lifestyle change, TENS, ultrasound, hydrotherapy, massage, diet, acupuncture, Chinese herbs) | This decision aid was developed for people considering surgery. We only included one treatment decision (i.e. surgery vs. non-surgical options) and hence, the evidence for surgery compared to non-surgical options |
|                                                                                   | Highlight whether delaying surgery or non-surgical treatment is harmful or not                                                                                                           | There is not enough evidence to address this issue. We suggested patients ask a health professional the following question: "Can I have surgery later? If so, how long should I wait before considering surgery?"    |
|                                                                                   | Provide more information on 'wait and see' (e.g. highlight that you can trial non-surgical options while you 'wait and see')                                                             | Opposing positive feedback on the description of non-surgical options                                                                                                                                                |
| <b>Change the non-surgical options presented</b>                                  | <b>Health professionals</b>                                                                                                                                                              |                                                                                                                                                                                                                      |
|                                                                                   | Inappropriate to mention medication and injections as options [PT/CP]                                                                                                                    | Cochrane reviews on treatments for subacromial pain syndrome show glucocorticoid injections are superior                                                                                                             |

|                                                              |                                                                                                                                               |                                                                                                                                                                                                                |
|--------------------------------------------------------------|-----------------------------------------------------------------------------------------------------------------------------------------------|----------------------------------------------------------------------------------------------------------------------------------------------------------------------------------------------------------------|
|                                                              |                                                                                                                                               | to placebo and provide similar effects to non-steroidal anti-inflammatory drugs (22) and physiotherapy-delivered treatments (e.g. exercise, manual therapy, electrotherapy) (23, 24)                           |
|                                                              | Mention the benefits of ultrasound for diagnosis and guiding injections [GP]                                                                  | Beyond the scope of this decision aid                                                                                                                                                                          |
|                                                              | Waiting 6 months might be too long for patients to do nothing [PT/OP]                                                                         | Opposing positive feedback on the description of non-surgical options                                                                                                                                          |
|                                                              | Order of non-surgical options might be inappropriate [CP/PT]                                                                                  | Opposing positive feedback on the order of non-surgical options                                                                                                                                                |
| <b>Include indications for surgery</b>                       | <b>Health professionals</b>                                                                                                                   |                                                                                                                                                                                                                |
|                                                              | Highlight that imaging findings in isolation aren't indications for surgery [PT/OS]                                                           | Peripheral to the main purpose of this decision aid                                                                                                                                                            |
|                                                              | Important for patients to know which procedure they are most likely to receive as this could influence recovery and rehabilitation needs [OS] | Too dependent on an individual's symptoms                                                                                                                                                                      |
|                                                              | Highlight that surgery may improve symptoms or anatomy but not address the cause [PT/OS]                                                      | Adding this information might be considered biased against surgery as non-surgical options might also not address the cause of symptoms                                                                        |
| <b>Present evidence of benefits or harms in this section</b> | <b>Health professionals</b>                                                                                                                   |                                                                                                                                                                                                                |
|                                                              | Mention the success rate of surgery and non-surgical options [GP/PT/OS]                                                                       | We only included data on pain and function from the two Cochrane reviews of shoulder surgery. Including findings from responder analyses would have conflicted with feedback to avoid repetition of statistics |
|                                                              | Emphasise the harms of surgery [PT/CP/GP]                                                                                                     | Adding this information would be biased against surgery. The presentation of benefits and harms in decision aids need to be balanced                                                                           |
| <b>Change information on surgery</b>                         | <b>Patients</b>                                                                                                                               |                                                                                                                                                                                                                |
|                                                              | Provide less information on surgery                                                                                                           | Opposing positive feedback on the level of detail about surgery                                                                                                                                                |

|                                                                                                                         |                                                                                                                                                               |                                                                                                                                                                                    |
|-------------------------------------------------------------------------------------------------------------------------|---------------------------------------------------------------------------------------------------------------------------------------------------------------|------------------------------------------------------------------------------------------------------------------------------------------------------------------------------------|
|                                                                                                                         | Provide more information on surgery and rehabilitation                                                                                                        | Opposing positive feedback on the level of detail about surgery and rehabilitation                                                                                                 |
| <b>WHAT ARE THE LIKELY BENEFITS OF SURGERY COMPARED TO NON-SURGICAL OPTIONS?</b>                                        |                                                                                                                                                               |                                                                                                                                                                                    |
| <b>Revise description for the certainty of evidence</b>                                                                 | <b>Health professionals</b>                                                                                                                                   |                                                                                                                                                                                    |
|                                                                                                                         | Remove the description of the certainty of evidence [PT/OS]                                                                                                   | Opposing positive feedback for acknowledging the certainty of evidence                                                                                                             |
| <b>Evidence doesn't match experience, more clarification needed</b>                                                     | <b>Health professionals</b>                                                                                                                                   |                                                                                                                                                                                    |
|                                                                                                                         | Evidence doesn't match experience (e.g. careful patient selection will yield better outcomes) [OS/GP]                                                         | We did not change the evidence presented because it is vital numeric estimates of benefits and harms in decision aids are based on the highest quality available evidence (15, 27) |
|                                                                                                                         | Evidence from Cochrane reviews may not be generalizable to patients [OS]                                                                                      |                                                                                                                                                                                    |
|                                                                                                                         | Highlight that surgery may increase the speed of recovery or yield better long-term outcomes [OS]                                                             |                                                                                                                                                                                    |
|                                                                                                                         | Add outcomes or provide further explanation for existing outcomes (e.g. include quality of life, define treatment success, emphasise pain results) [GP/PT/OP] | We limited outcomes to pain and function from the two Cochrane reviews of shoulder surgery to avoid repetition                                                                     |
| Highlight that surgery may be useful for preventing tears progressing even if there was no improvement in symptoms [OS] | We limited the potential benefits of surgery to data presented in the two Cochrane reviews of shoulder surgery                                                |                                                                                                                                                                                    |
| <b>Simplify the statistics</b>                                                                                          | <b>Health professionals</b>                                                                                                                                   |                                                                                                                                                                                    |
|                                                                                                                         | Avoid numeric estimates (e.g. 3% could be framed as 'small') [PT]                                                                                             | Opposing positive feedback on the presentation of numeric estimates                                                                                                                |
| <b>Provide more detail and clarify the evidence</b>                                                                     | <b>Patients</b>                                                                                                                                               |                                                                                                                                                                                    |
|                                                                                                                         | Adding the age range of research participants is not necessary unless being outside this range would influence the benefits of surgery                        | Opposing feedback to mention the population of the evidence                                                                                                                        |
| <b>Contextualise the evidence to reflect uncertainty on an individual level</b>                                         | <b>Patients</b>                                                                                                                                               |                                                                                                                                                                                    |
|                                                                                                                         | Statistics shouldn't influence treatment decisions as they are averages and patients should trust their health professional's advice                          | We did not change the evidence presented because it is vital numeric estimates of benefits and harms in                                                                            |

|                                                                     |                                                                                                                                                             |                                                                                                                                                                                    |
|---------------------------------------------------------------------|-------------------------------------------------------------------------------------------------------------------------------------------------------------|------------------------------------------------------------------------------------------------------------------------------------------------------------------------------------|
|                                                                     |                                                                                                                                                             | decision aids are based on the highest quality available evidence (15, 27)                                                                                                         |
| <b>Modify the formatting or language used</b>                       | <b>Health professionals</b><br>Make the bar graphs vertical [PT/CP]                                                                                         | We removed the bar graphs due to negative feedback                                                                                                                                 |
| <b>WHAT ARE THE LIKELY HARMS OF SURGERY?</b>                        |                                                                                                                                                             |                                                                                                                                                                                    |
| <b>Present minor and serious harms</b>                              | <b>Health professionals</b><br>Mention revision surgery as a possible adverse event [OS]                                                                    | Not a direct harm of surgery                                                                                                                                                       |
|                                                                     | <b>Patients</b><br>Definition of minor and serious adverse event is problematic because severity is subjective                                              | Opposing feedback to separate minor and serious harms                                                                                                                              |
| <b>Provide more context for harms</b>                               | <b>Health professionals</b><br>Compare the harms of surgery and non-surgical options [PT/CP]                                                                | Data on the potential harms of non-surgical options was not available                                                                                                              |
| <b>Evidence doesn't match experience, more clarification needed</b> | <b>Health professionals</b><br>Harms might be overestimated [OS]                                                                                            | We did not change the evidence presented because it is vital numeric estimates of benefits and harms in decision aids are based on the highest quality available evidence (15, 27) |
|                                                                     | Harms might be underestimated [PT]                                                                                                                          |                                                                                                                                                                                    |
| <b>Modify the formatting or language used</b>                       | <b>Health professionals</b><br>Move harms to practical issues section [CP]                                                                                  | Opposing feedback to use the same format when presenting benefits and harm                                                                                                         |
|                                                                     | Replace 'harm' with a less emotive word (e.g. 'risk', 'complication') [OS]                                                                                  | 'Harm' is a more accurate term than 'risk' and is used more frequently in the decision aid literature                                                                              |
|                                                                     | <b>Patients</b><br>Change the terminology used (e.g. 'harms' too negative, change 'harms' to 'risk', change 'person' to 'people', define 'frozen shoulder') | 'Harm' is a more accurate term than 'risk' and is used more frequently in the decision aid literature                                                                              |
| <b>SUMMARY OF BENEFITS, HARMS, AND OTHER PRACTICAL ISSUES</b>       |                                                                                                                                                             |                                                                                                                                                                                    |
|                                                                     | <b>Health professionals</b>                                                                                                                                 |                                                                                                                                                                                    |

|                                                                                                                                                     |                                                                                                                                                                                                                           |                                                                        |
|-----------------------------------------------------------------------------------------------------------------------------------------------------|---------------------------------------------------------------------------------------------------------------------------------------------------------------------------------------------------------------------------|------------------------------------------------------------------------|
| <b>Revise information on costs</b>                                                                                                                  | Include the cost of non-surgical options (e.g. time, effort, cost without insurance coverage) [CP]                                                                                                                        | Costs vary too much to include an accurate figure                      |
|                                                                                                                                                     | Be specific about costs to emphasis the true cost of surgery [PT/GP]                                                                                                                                                      |                                                                        |
|                                                                                                                                                     | <b>Patients</b>                                                                                                                                                                                                           |                                                                        |
|                                                                                                                                                     | Be more specific about costs (e.g. time off work, add "speak to your GP and insurance provider to understand exact costs", costs of non-surgical options, non-surgical options might equally expensive in some countries) | Costs vary too much to include an accurate figure                      |
| <b>Revise information on activity restrictions and post-surgical management</b>                                                                     | Highlight that waiting times are long and costs are higher without private insurance                                                                                                                                      | This might not apply to all health systems                             |
|                                                                                                                                                     | <b>Health professionals</b>                                                                                                                                                                                               |                                                                        |
|                                                                                                                                                     | Add a row for 'social support' (e.g. getting dressed, dishes, transport to appointments) [PT]                                                                                                                             | Information mostly covered already                                     |
|                                                                                                                                                     | Include activity restriction timeframes for non-surgical options [PT]                                                                                                                                                     | Activity restriction timeframes varied by health professional too much |
|                                                                                                                                                     | Highlight that recovery is influenced by the severity of a patients' pre-intervention symptoms [OS]                                                                                                                       | Suggestion was not relevant to this section                            |
|                                                                                                                                                     | <b>Patients</b>                                                                                                                                                                                                           |                                                                        |
|                                                                                                                                                     | Emphasise driving restrictions                                                                                                                                                                                            | Driving restriction timeframes varied by health professionals too much |
| <b>Modify the formatting or language used</b>                                                                                                       | Add a column for 'no treatment'                                                                                                                                                                                           | 'No treatment' is covered in the 'non-surgical options' column         |
|                                                                                                                                                     | <b>Health professionals</b>                                                                                                                                                                                               |                                                                        |
|                                                                                                                                                     | Separating practical issues by type of surgery resulted in too much information [PT]                                                                                                                                      | Opposing feedback to separate practical issues by type of surgery      |
|                                                                                                                                                     | Split the practical issues section by type of surgery [GP]                                                                                                                                                                |                                                                        |
| Could use a checkbox to reduce the number of words in the 'Activity restrictions' section (e.g. sling (tick); 3-4 weeks off work (tick), etc.) [CP] | Opposing positive feedback on the layout of this section                                                                                                                                                                  |                                                                        |

|                                                                            |                                                                                                                                              |                                                                                                                                             |
|----------------------------------------------------------------------------|----------------------------------------------------------------------------------------------------------------------------------------------|---------------------------------------------------------------------------------------------------------------------------------------------|
|                                                                            | Change title of this section to "What will my recovery look like after surgery and non-surgical options" to reduce bias against surgery [PT] | We removed the headings to save space                                                                                                       |
|                                                                            | Remove this page entirely as patients will be losing interest by this point [OS]                                                             | Opposing positive feedback on this section                                                                                                  |
|                                                                            | <b>Patients</b>                                                                                                                              |                                                                                                                                             |
|                                                                            | Acknowledge that timeframes are averages so patients don't get disheartened when they don't reach a milestone on time                        | We included timeframe ranges to address this comment                                                                                        |
| <b>QUESTIONS TO CONSIDER WHEN TALKING WITH A HEALTH PROFESSIONAL</b>       |                                                                                                                                              |                                                                                                                                             |
|                                                                            | <b>Health professionals</b>                                                                                                                  |                                                                                                                                             |
| <b>Adding and removing questions</b>                                       | Remove questions (e.g. "Do I know enough about my condition"; "Have I considered my individual circumstances") [OS]                          | Opposing positive feedback on these questions                                                                                               |
|                                                                            | <b>Health professionals</b>                                                                                                                  |                                                                                                                                             |
|                                                                            | Could replace "Questions to consider when talking with your doctor" section with "Any further questions, ask your doctor" to save space [GP] | Opposing positive feedback on this section                                                                                                  |
| <b>Modify the formatting</b>                                               | Change the heading of this section so it applies to GPs [PT]                                                                                 | Opposing feedback to change the heading of this section so it applies to any health professional                                            |
|                                                                            | <b>Patients</b>                                                                                                                              |                                                                                                                                             |
|                                                                            | Remove this whole section to create space                                                                                                    | Opposing positive feedback on this section                                                                                                  |
|                                                                            | Categorise questions based on which health professional should answer them                                                                   | Too much overlap between health professionals who could answer each question                                                                |
| <b>ARE THERE OTHER THINGS I CAN DO?*</b>                                   |                                                                                                                                              |                                                                                                                                             |
|                                                                            | <b>Health professionals</b>                                                                                                                  |                                                                                                                                             |
| <b>Modify information to help people choose non-surgical options first</b> | Move this section to the first page and make it clear surgery is a last resort [PT/CP]                                                       | We thought it was important to present the options (and evidence) before patients reflect on questions they could ask a health professional |
|                                                                            | Be specific about what exercises can be done [PT/CP]                                                                                         | Beyond the scope of this decision aid                                                                                                       |

Emphasise that there is often no need for early surgery and no harms in delaying surgery [OS/PT]

We suggested patients ask a health professional the following question: “Can I have surgery later? If so, how long should I wait before considering surgery?”

## OVERALL FEEDBACK

|                                               |                                                                                                                           |                                                                                                                                                          |
|-----------------------------------------------|---------------------------------------------------------------------------------------------------------------------------|----------------------------------------------------------------------------------------------------------------------------------------------------------|
| <b>Reduce amount of information</b>           | <b>Health professionals</b>                                                                                               |                                                                                                                                                          |
|                                               | A 2-page decision aid is ideal [PT/CP/GP]                                                                                 | Opposing feedback that all information in the decision aid is important                                                                                  |
|                                               | The decision aid includes too much information [GP/OS/PT]                                                                 |                                                                                                                                                          |
|                                               | Create a simplified version of the decision aid for patients [PT]                                                         | Positive feedback from patients that this decision aid is easy to understand                                                                             |
|                                               | Remove some sections (e.g. questions to ask a health professional, references, rotator cuff repair surgery) [PT/OS]       | Opposing positive feedback on these sections                                                                                                             |
| <b>More detail needed</b>                     | <b>Health professionals</b>                                                                                               |                                                                                                                                                          |
|                                               | Include a section on diagnostic imaging (X-Ray, MRI, Ultrasound) and the importance of not missing a serious disease [GP] | Beyond the scope of this decision aid                                                                                                                    |
|                                               | More detail is needed if the decision aid will be used without input from a health professional [PT]                      | Positive feedback from patients that this decision aid is easy to understand                                                                             |
|                                               | <b>Patients</b>                                                                                                           |                                                                                                                                                          |
|                                               | Last page lacks a solution if a patient has tried everything else                                                         | There is no evidence to address this complex issue                                                                                                       |
|                                               | Encourage people to seek a second opinion or further information                                                          | Positive feedback that the decision aid covers all important information                                                                                 |
| <b>Formatting or distribution suggestions</b> | <b>Health professionals</b>                                                                                               |                                                                                                                                                          |
|                                               | Create separate decision aids for each procedure [CP/OS/GP]                                                               | This would prevent patients using the decision aid before consulting with a surgeon as they would not know which surgery they are most likely to receive |
|                                               | Create separate decision aids for surgical and non-surgical options [GP]                                                  | The evidence compares surgery to non-surgical options, so it is important these options are listed in the same decision aid                              |
|                                               | Create a video summary of the decision aid [PT/CP]                                                                        | This is a consideration for a future project                                                                                                             |



|                                                                 |                                                                                                                                |                                                                                                                                                          |
|-----------------------------------------------------------------|--------------------------------------------------------------------------------------------------------------------------------|----------------------------------------------------------------------------------------------------------------------------------------------------------|
|                                                                 | Acknowledge that treatment decisions might be influenced by the health professional the decision aid is discussed with [PT/OS] | We felt that this information would not add value to this decision aid                                                                                   |
|                                                                 | <b>Patients</b>                                                                                                                |                                                                                                                                                          |
|                                                                 | Include page numbers                                                                                                           |                                                                                                                                                          |
|                                                                 | Create several decision aids (e.g. one for each surgery, one for patients and one for health professionals)                    | This would prevent patients using the decision aid before consulting with a surgeon as they would not know which surgery they are most likely to receive |
|                                                                 | Remove 'disclosure' section                                                                                                    | Opposing positive feedback on the this section                                                                                                           |
|                                                                 | Emphasise the question asking section and de-emphasise others (e.g. harms, causes of shoulder pain, references)                | Opposing positive feedback on these sections                                                                                                             |
|                                                                 | <b>Health professionals</b>                                                                                                    |                                                                                                                                                          |
| <b>Suspects bias or questions relevance of the decision aid</b> | Thought the decision aid's underlying goal is to reduce the use of surgery and thought it should be more balanced [OS]         | Opposing positive feedback suggesting the presentation of options was balanced                                                                           |
|                                                                 | Believes evidence is changing and the decision aid may become irrelevant overtime [OS]                                         | We plan to update the decision aid as new evidence emerges                                                                                               |

CP: chiropractor; GP: general practitioner; PT: physiotherapist; OP: osteopath; OS: orthopaedic surgeon.

\*: this section was removed from the decision aid to save space so we could provide more detail about non-surgical options on the first page.
