# Supplementary material for: Development of a patient decision aid on subacromial decompression surgery and rotator cuff repair surgery: an international mixed-methods study
Source: PubMed Central journal article supplement — BMJ Open. 2021 Aug 25;11(8):e054032. doi: 10.1136/bmjopen-2021-054032 (PMC8407224; doi:10.1136/bmjopen-2021-054032), 2021-08-25
Supplement: bmjopen-2021-054032supp017.pdf [file bmjopen-2021-054032supp017.pdf]

## What are the likely **harms** of arthroscopic surgery?

Each figure represents one person. We can't predict whether you will be one of the people who is harmed.

-  has serious problems
-  no serious problems

100 people who **do** have surgery

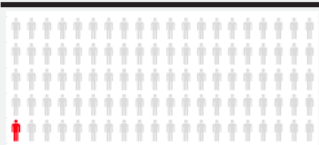

Based on moderate-certainty evidence, **less than 1 person per 100** that receives arthroscopic surgery will have serious (and potentially life-threatening) problems like infection, nerve injury, deep vein thrombosis, pulmonary embolism, heart attack, stroke and pneumonia.

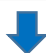

## What are the likely **harms** of surgery?

Think of each figure as **1 person**. We can't predict if you will be one of the people who is harmed. Harms are more common among people with other health conditions (e.g. diabetes, heart disease).

-  has frozen shoulder or minor harms
-  has serious problems

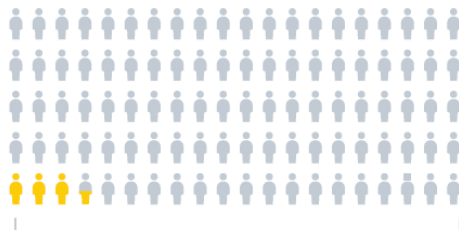

**About 3 people per 100**

that have surgery will develop frozen shoulder (which may cause shoulder pain and stiffness for up to 2 years) or minor harms with surgery.

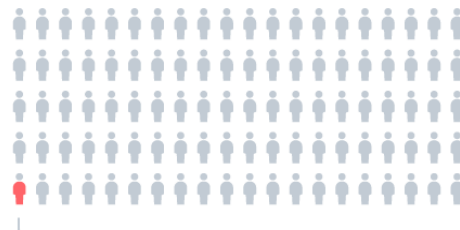

**About 1 person per 100**

that has surgery will have serious (and potentially life-threatening) problems like infection, nerve injury, heart attack, stroke and pneumonia.
