# Supplementary material for: Development of a patient decision aid on subacromial decompression surgery and rotator cuff repair surgery: an international mixed-methods study
Source: PubMed Central journal article supplement — BMJ Open. 2021 Aug 25;11(8):e054032. doi: 10.1136/bmjopen-2021-054032 (PMC8407224; doi:10.1136/bmjopen-2021-054032), 2021-08-25
Supplement: bmjopen-2021-054032supp018.pdf [file bmjopen-2021-054032supp018.pdf]

## What practical issues should I consider?

The table shows key practical issues for those who have arthroscopic surgery and those who do not.

|                         | ARTHROSCOPIC SURGERY                                                                                                          | NO SURGERY                                                                                                                    |
|-------------------------|-------------------------------------------------------------------------------------------------------------------------------|-------------------------------------------------------------------------------------------------------------------------------|
| Procedure and follow-up | Performed by a surgeon in an operating theatre. Requires an anesthetic. Individualised follow-up with wound care and exercise | Advice from a professional about other treatments may be useful (eg. injections, exercise, activity modification, medication) |
| Recuperation            | You may use a sling a few days after surgery. Recuperation typically takes between 2-6 weeks                                  | No recuperation needed                                                                                                        |
| Activity restrictions   | Avoid heavy lifting for 7-21 days, overhead activities for 6 weeks and pushing through your hands for 3 months                | No activity restrictions                                                                                                      |
| Time off work           | Depends on recovery and demands of job. Usually a few weeks after surgery                                                     | No time off work                                                                                                              |
| Driving                 | You can start driving as soon as you feel able to steer. This is normally after one week                                      | No driving limitations                                                                                                        |
| Costs                   | Out-of-pocket costs for surgery are generally high. There may also be out-of-pocket costs for physiotherapy after surgery     | No surgical costs BUT there may be out-of-pocket costs for physiotherapy or injections                                        |

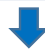

### + Summary of benefits, harms, and other practical issues

#### NON-SURGICAL OPTIONS

##### ✓ Potential benefits

- May **improve by itself** (within 6 months half of people will recover) or with non-surgical options (ie. injections, exercise, or medication)
- **Avoid surgery**

##### – Potential harms

- May decide to **have surgery later**
- **Cost of non-surgical options** (eg. injection, physiotherapy)
- **Time to attend health appointments** (eg. for physiotherapy)
- Regardless of what treatment you have, your symptoms **may not improve**

#### SURGERY FOLLOWED BY 3-12 MONTHS REHABILITATION

##### ✓ Potential benefits

- May provide **slight improvement in pain and function** compared to non-surgical options

##### – Potential harms

- Possible **surgical harms** (eg. frozen shoulder, infection)
- Your symptoms **may not improve** with surgery
- **Symptoms will temporarily be worse after surgery** due to the operation (eg. pain when sleeping or moving your arm)
- **Rehabilitation for 3-12 months** after surgery and time to attend rehabilitation
- May take up to **6 weeks** after subacromial decompression and **12 weeks** after rotator cuff repair to perform daily activities (eg. reach above your head, lift heavy objects)
- May take **3-4 months** after subacromial decompression and **6-12 months** after rotator cuff repair to return to heavy manual work, exercise, or sport
- **Out-of-pocket costs** are generally higher for surgery than non-surgical options. There may be **costs for rehabilitation** after surgery and due to **time needed off work**
